# Supplementary material
Source: Springer Nature journal article supplement (https://www.springermedizin.de/resource/supplementary/12911_2010_388_MOESM6_ESM.pdf/9525628)

### Overall survival

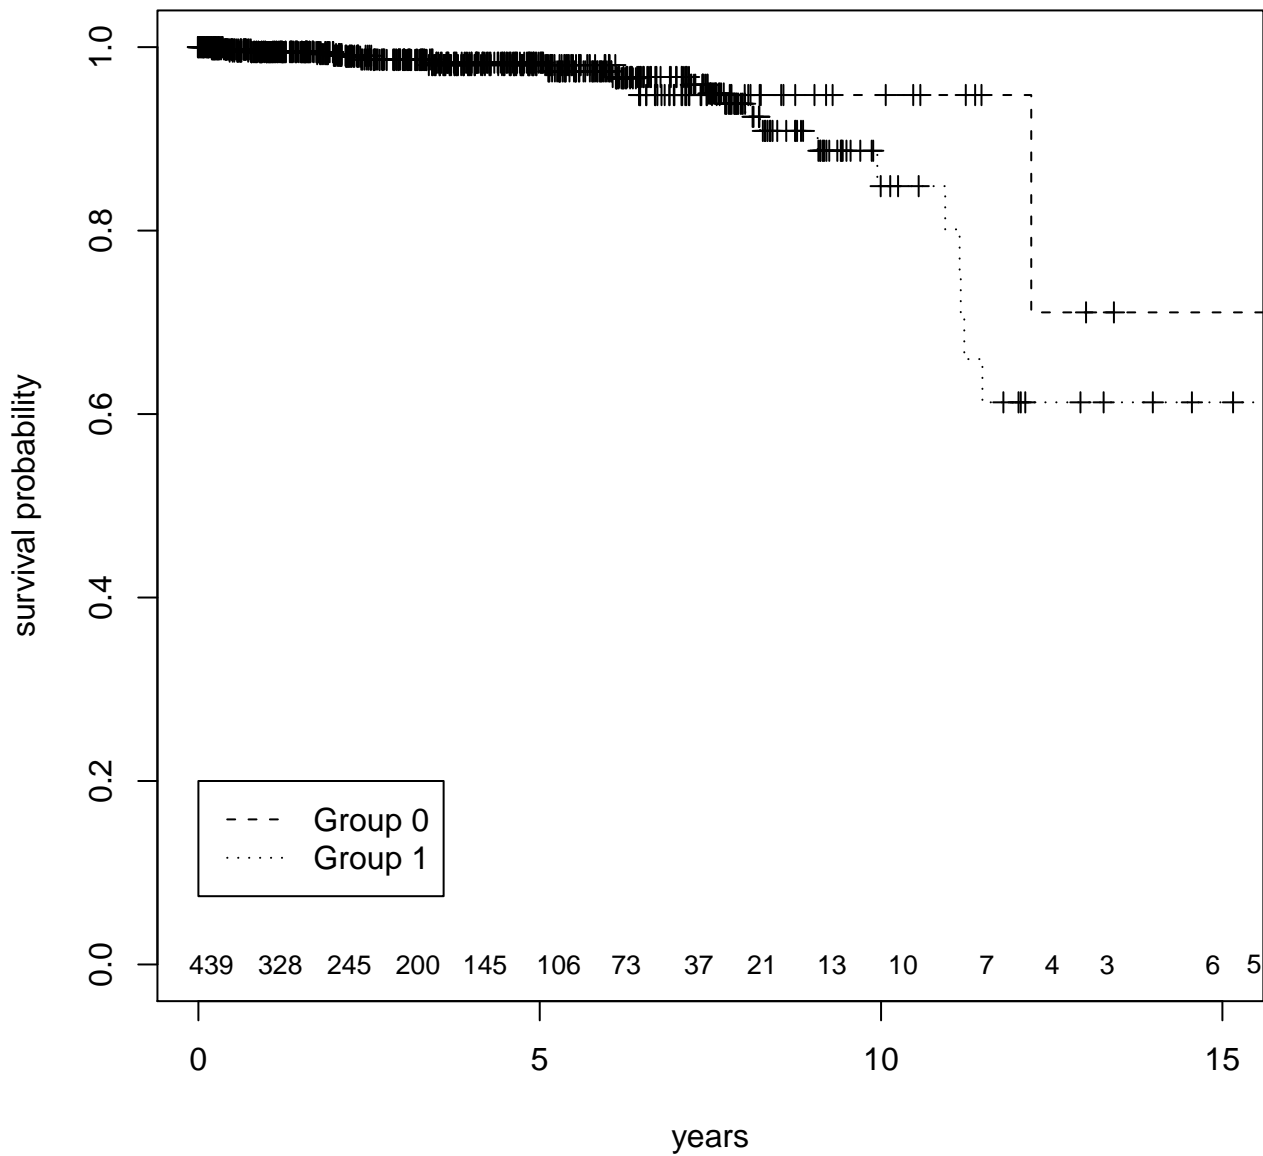

### Event-free survival

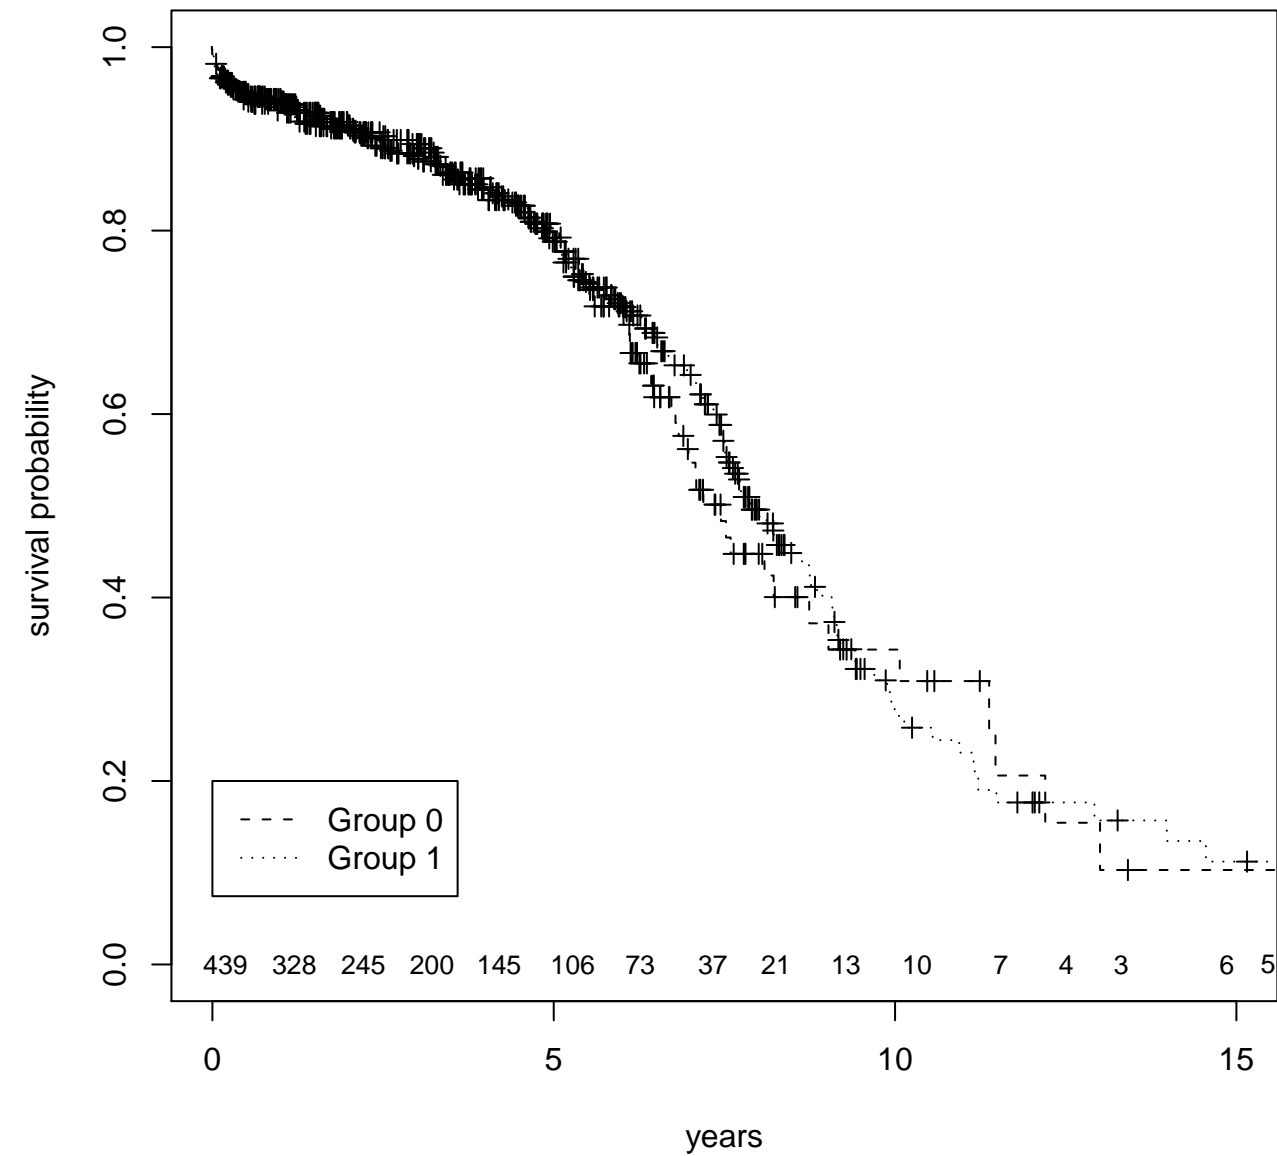

Supplement: MOESM6 [file 9525628]
